# Supplementary material
Source: publisher figshare collection journal article supplement (https://acs.figshare.com/ndownloader/files/24720444)
Supplement: Supplementary file 1 [file 24720444]

## Supporting Information

# Polarization-Dependent Light Emission and Charge Creation in MoS<sub>2</sub> Monolayers on Plasmonic Au Nanogratings

*Soyeong Kwon<sup>1</sup>, Seong-Yeon Lee<sup>2</sup>, Soo Ho Choi<sup>3</sup>, Jang-Won Kang<sup>4</sup>, Taejin Lee<sup>5</sup>, Jungeun Song<sup>1</sup>,  
Sang Wook Lee<sup>1</sup>, Chang-Hee Cho<sup>5</sup>, Ki Kang Kim<sup>3,6</sup>, Ki-Ju Yee<sup>2</sup>, and Dong-Wook Kim<sup>1,\*</sup>*

<sup>1</sup>Department of Physics, Ewha Womans University, Seoul 03760, Korea

<sup>2</sup>Department of Physics, Chungnam National University, Daejeon 34134, Korea

<sup>3</sup>Center for Integrated Nanostructure Physics (CINAP), Institute of Basic Science (IBS),  
Sungkyunkwan University, Suwon 16419, Korea

<sup>4</sup>Department of Physics, Mokpo National University, Muan, Jeollanam-do 58554, Korea

<sup>5</sup>Department of Emerging Materials Science, DGIST, Daegu 42988, Korea

<sup>6</sup>Department of Energy Science, Sungkyunkwan University, Suwon 16419, Korea

### Corresponding Author

\*Email: dwkim@ewha.ac.kr

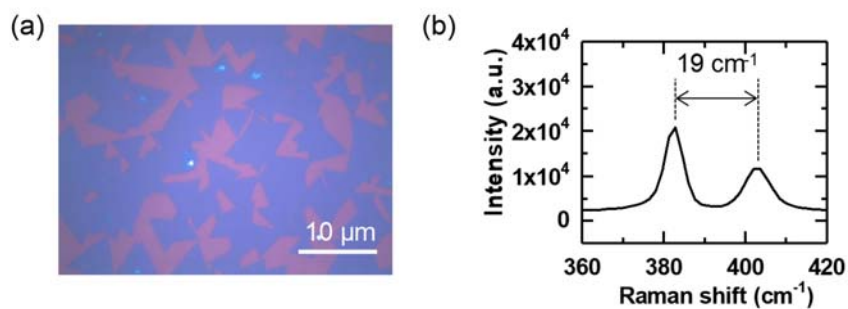

**Figure S1.** (a) An optical micrograph and (b) a Raman spectrum of MoS<sub>2</sub> flakes on SiO<sub>2</sub>/Si substrates. For the growth of MoS<sub>2</sub> monolayers, sodium molybdate solution was coated on hydrophilic SiO<sub>2</sub>/Si substrates as molybdenum precursor and the sulfur was supplied by a flow of dimethyl disulfide and with a bubbler. The synthesis was carried out at 800°C with growth temperature while using Ar carrier gas using a chemical vapor deposition technique. The spacing between the two Raman peaks is 19 cm<sup>-1</sup>, indicating the formation of MoS<sub>2</sub> monolayer flakes.

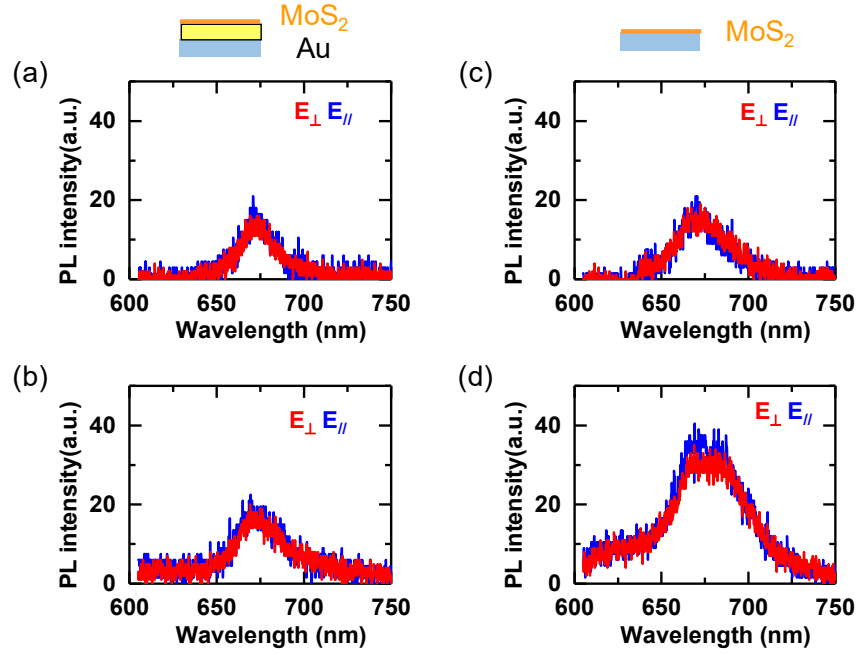

**Figure S2.** Polarization-dependent PL spectra of MoS<sub>2</sub> monolayer flakes on planar SiO<sub>2</sub>/Si substrates (a,b) with and (c,d) without Au thin films, as illustrated above the spectra. The PL spectra were obtained using excitation lasers with wavelength of (a,c) 620 nm and (b,d) 545 nm. Red and blue lines correspond to the spectra with light polarization perpendicular ( $E_{\perp}$ ) and (b) parallel ( $E_{\parallel}$ ) to the grating. The laser power density was 4.5  $\mu\text{W}/\mu\text{m}^2$  and 4  $\mu\text{W}/\mu\text{m}^2$  for the excitation sources with wavelength of 620 nm and 545 nm, respectively.

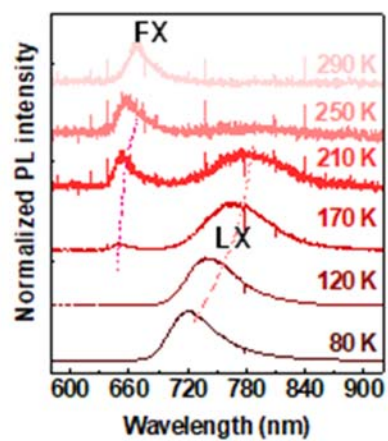

**Figure S3.** Temperature-dependent PL spectra of MoS<sub>2</sub>/AG under 532 nm illumination from 80 K to 290 K. Free exciton (FX) peaks and localized exciton (LX) are dominant at high and low temperatures, respectively.

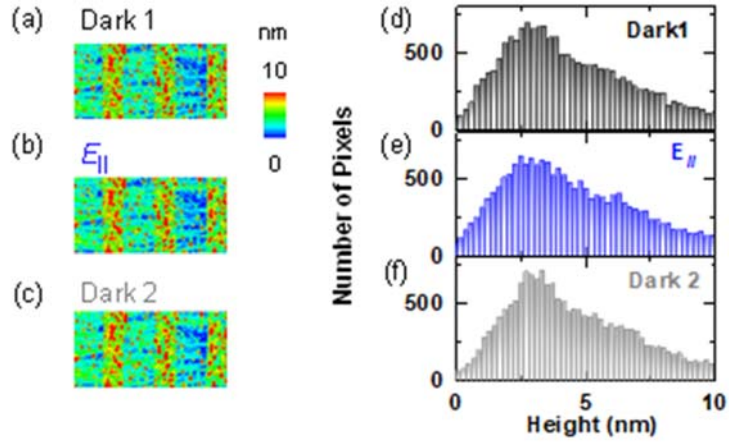

**Figure S4.** Atomic force microscopy images of MoS<sub>2</sub>/AG with dimensions of  $1.5 \times 0.75 \mu\text{m}^2$  obtained (a,c) in dark and (b) under illumination of 650-nm-light with  $8 \text{ mW/cm}^2$ . The images obtained (a) after storing the sample for more than 3 hours in dark [Dark1], (b) under  $E_{||}$ -polarized light illumination [ $E_{||}$ ], and (c) in dark 5 minutes later the  $E_{||}$ -polarized light illumination [Dark2]. Histograms of height of the MoS<sub>2</sub> monolayers on AG from the images in (d) a [Dark1], (e) b [ $E_{||}$ ], and (f) c [Dark2].

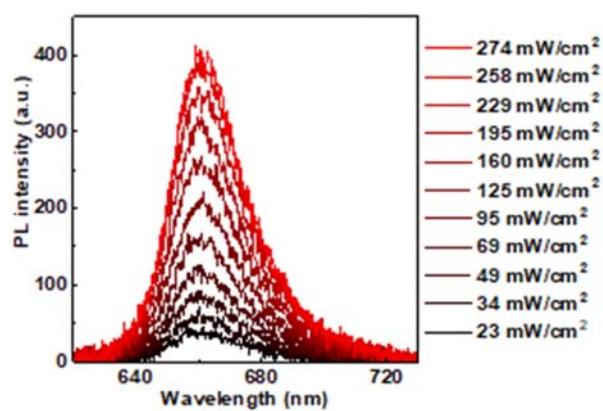

**Figure S5.** Laser power dependent PL spectra of MoS<sub>2</sub>/AG under 532-nm-light irradiation with power density from 23 mW/cm<sup>2</sup> to 274 mW/cm<sup>2</sup>. The laser beam spot size was 0.1 cm<sup>2</sup>, similar to that used in the KPFM measurements.
